# Supplementary material
Source: MDPI journal article supplement (https://www.mdpi.com/2673-8112/2/5/42)
Supplement: s1 [file s1]

Archive with 1 entries (1 files):
- covid-1700965-supplementary.pdf
