# Supplementary material
Source: MDPI journal article supplement (https://www.mdpi.com/2673-8112/2/5/42)
Supplement: s1 [file s1 › covid-1700965-supplementary.pdf]

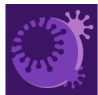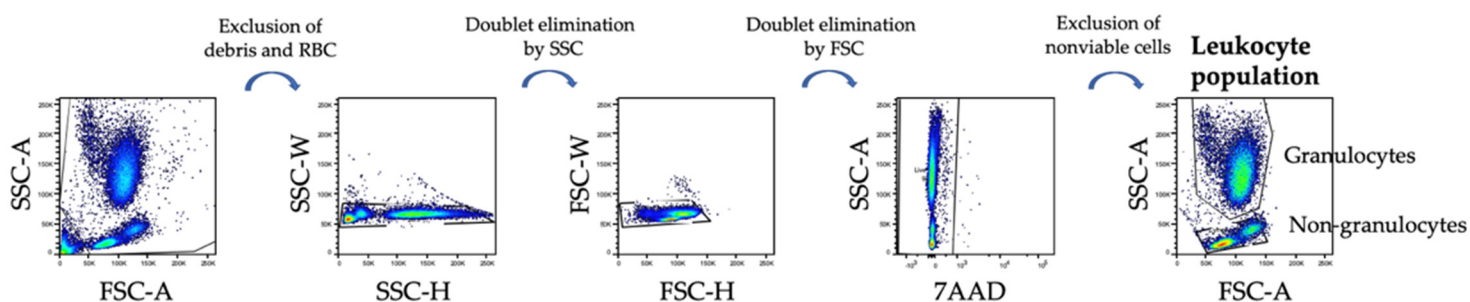

**Supplementary Figure S1. Gating strategy to define the leukocyte population of interest.** FCS-A vs. SSC-A: all electric events; SSC-H vs. SSC-W: all electric events after the exclusion of debris and red blood cells (RBCs); FCS-H vs. FSC-W: all electric events after the elimination of doublet signals by SSC; 7-ADD vs. SSC-A: all electric events after the elimination of doublet signals by FSC (expressed as hemi-logarithmic scale); FSC-A vs. SSC-A: all electrical events after the exclusion of nonviable cells. Details for flow cytometry gating are available in [1].

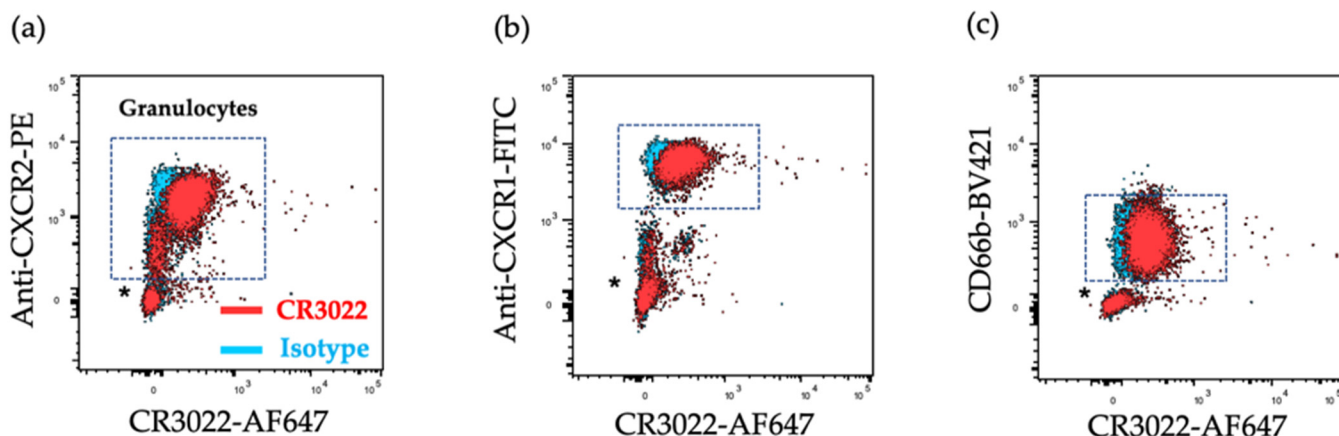

**Supplementary Figure S2. Representative results of flow cytometric analysis for samples without recombinant CoV2S1 (rCoV2S1) presented as a dot plot.** The dashed-line rectangle shows a biexponential dot plot of the signal intensity of the fluorochrome-conjugated antibodies on granulocytes (see Supplemental Figure 1 for the definition of the granulocyte population). Additional details are provided in the legend to Figure 1.

**Supplementary Table S1. Healthy donor information**

| Healthy donor | Age (years) | Sex  | Complications | Medications | SARS-CoV-2 infection |
|---------------|-------------|------|---------------|-------------|----------------------|
| 1             | 38          | Male | None          | None        | Not experienced      |
| 2             | 68          | Male | None          | None        | Not experienced      |

**Supplementary Table S2. Overview of the reagents used for flow cytometric analysis.**

| Reagent                                | Company, identifier | Isotype               | Titer (μL/sample) |
|----------------------------------------|---------------------|-----------------------|-------------------|
| Recombinant SARS-CoV-2 glycoprotein S1 | Abcam, 273068       | —                     | 1.5 or 7.5 or 15  |
| CR3022                                 | Abcam, 273074       | Rabbit monoclonal IgG | 0.4               |
| Rabbit IgG                             | CST, 3900S          | Rabbit monoclonal IgG | 0.16              |
| AF647/anti rabbit IgG                  | BioLegend, 406414   | Donkey polyclonal IgG | 0.4               |
| Fc Block                               | BD, 564220          | Human monoclonal IgG1 | 1                 |
| PE/Anti CD182 antibody                 | BioLegend, 320705   | Mouse monoclonal IgG1 | 0.8               |
| FITC/Anti CD181 antibody               | BioLegend, 320605   | Mouse monoclonal IgG1 | 0.8               |
| BV421/Anti CD66b antibody              | BioLegend, 305111   | Mouse monoclonal IgM  | 0.5               |

AF, Alexa Fluor; PE, phycoerythrin; FITC, fluorescein isothiocyanate; BV, Brilliant Violet.

#### Supplementary reference

1. BD FACSAria™ II & III Cell Sorter Training Manual Ver1.1; Nippon Becton Dickinson Co., Ltd, 2016;
